# Supplementary material
Source: publisher figshare collection journal article supplement (https://frontiersin.figshare.com/ndownloader/files/28958910)
Supplement: Supplementary file 1 [file 28958910]

## Supplementary Figures and Tables:

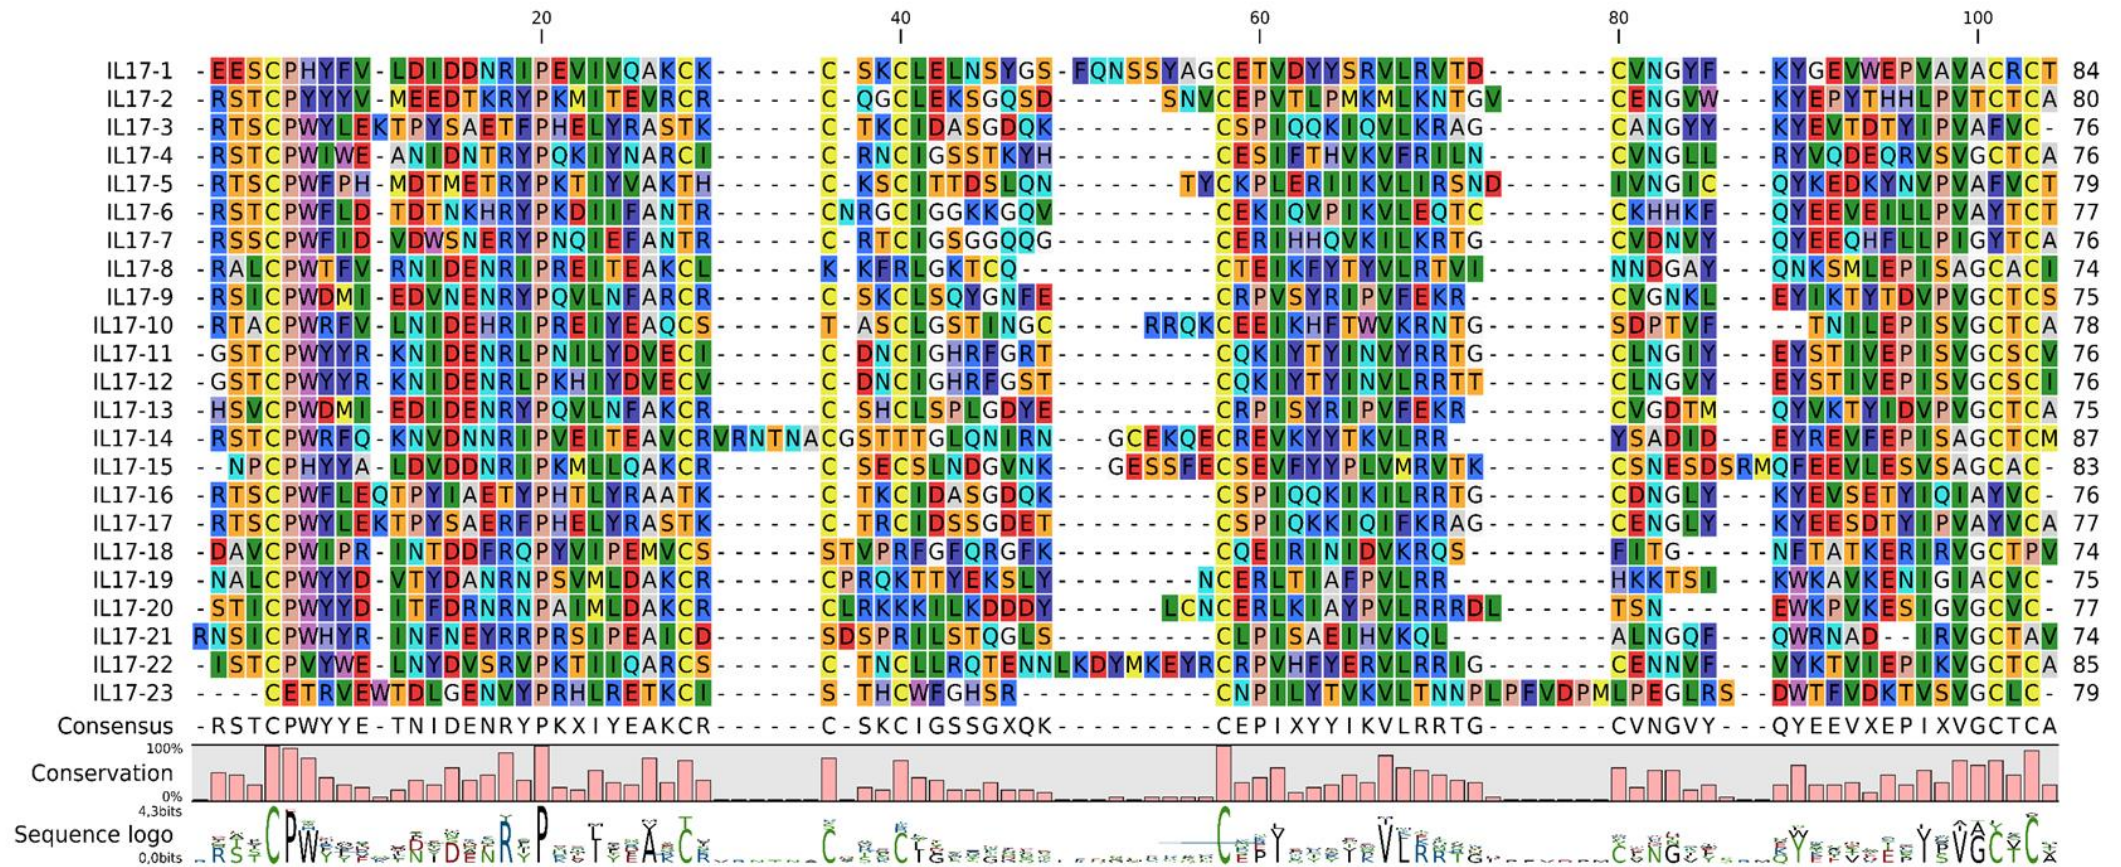

**Supplementary Figure S1. Multiple sequence alignment with the IL17 domain of a representative sequence from each IL-17 mussel isoform.** Conservation of each position is represented. The cysteine knot fold motif that distinguish the conserved structure of IL-17 is maintained in every sequence.

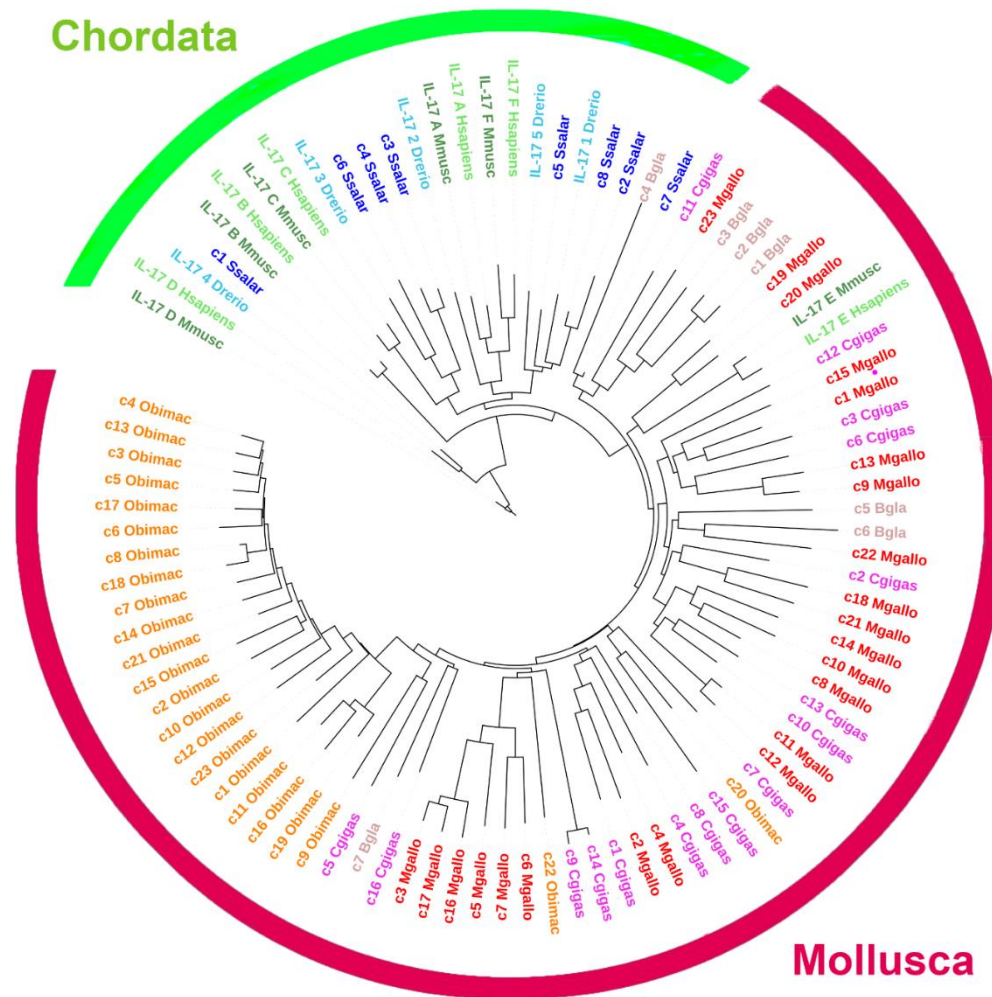

**Supplementary Figure S2. Neighbor joining phylogenetic analysis of different selected species.** Sequences from the repertoires of selected Chordata species (*Homo sapiens*, *Mus musculus*, *Danio rerio*, *Salmo salar*) and Mollusca species (*Mytilus galloprovincialis*, *Crassostrea gigas*, *Biomphalaria glabrata*, *Octopus bimaculoides*) were submitted to phylogenetic analysis. Results evidence the lack of homolog sequences between different phyla. The tree is clustered by phyla/species and not by isoform. Clustering by isoform can be only observed when working only with phylogenetically close IL-17 repertoires, with homolog genes.



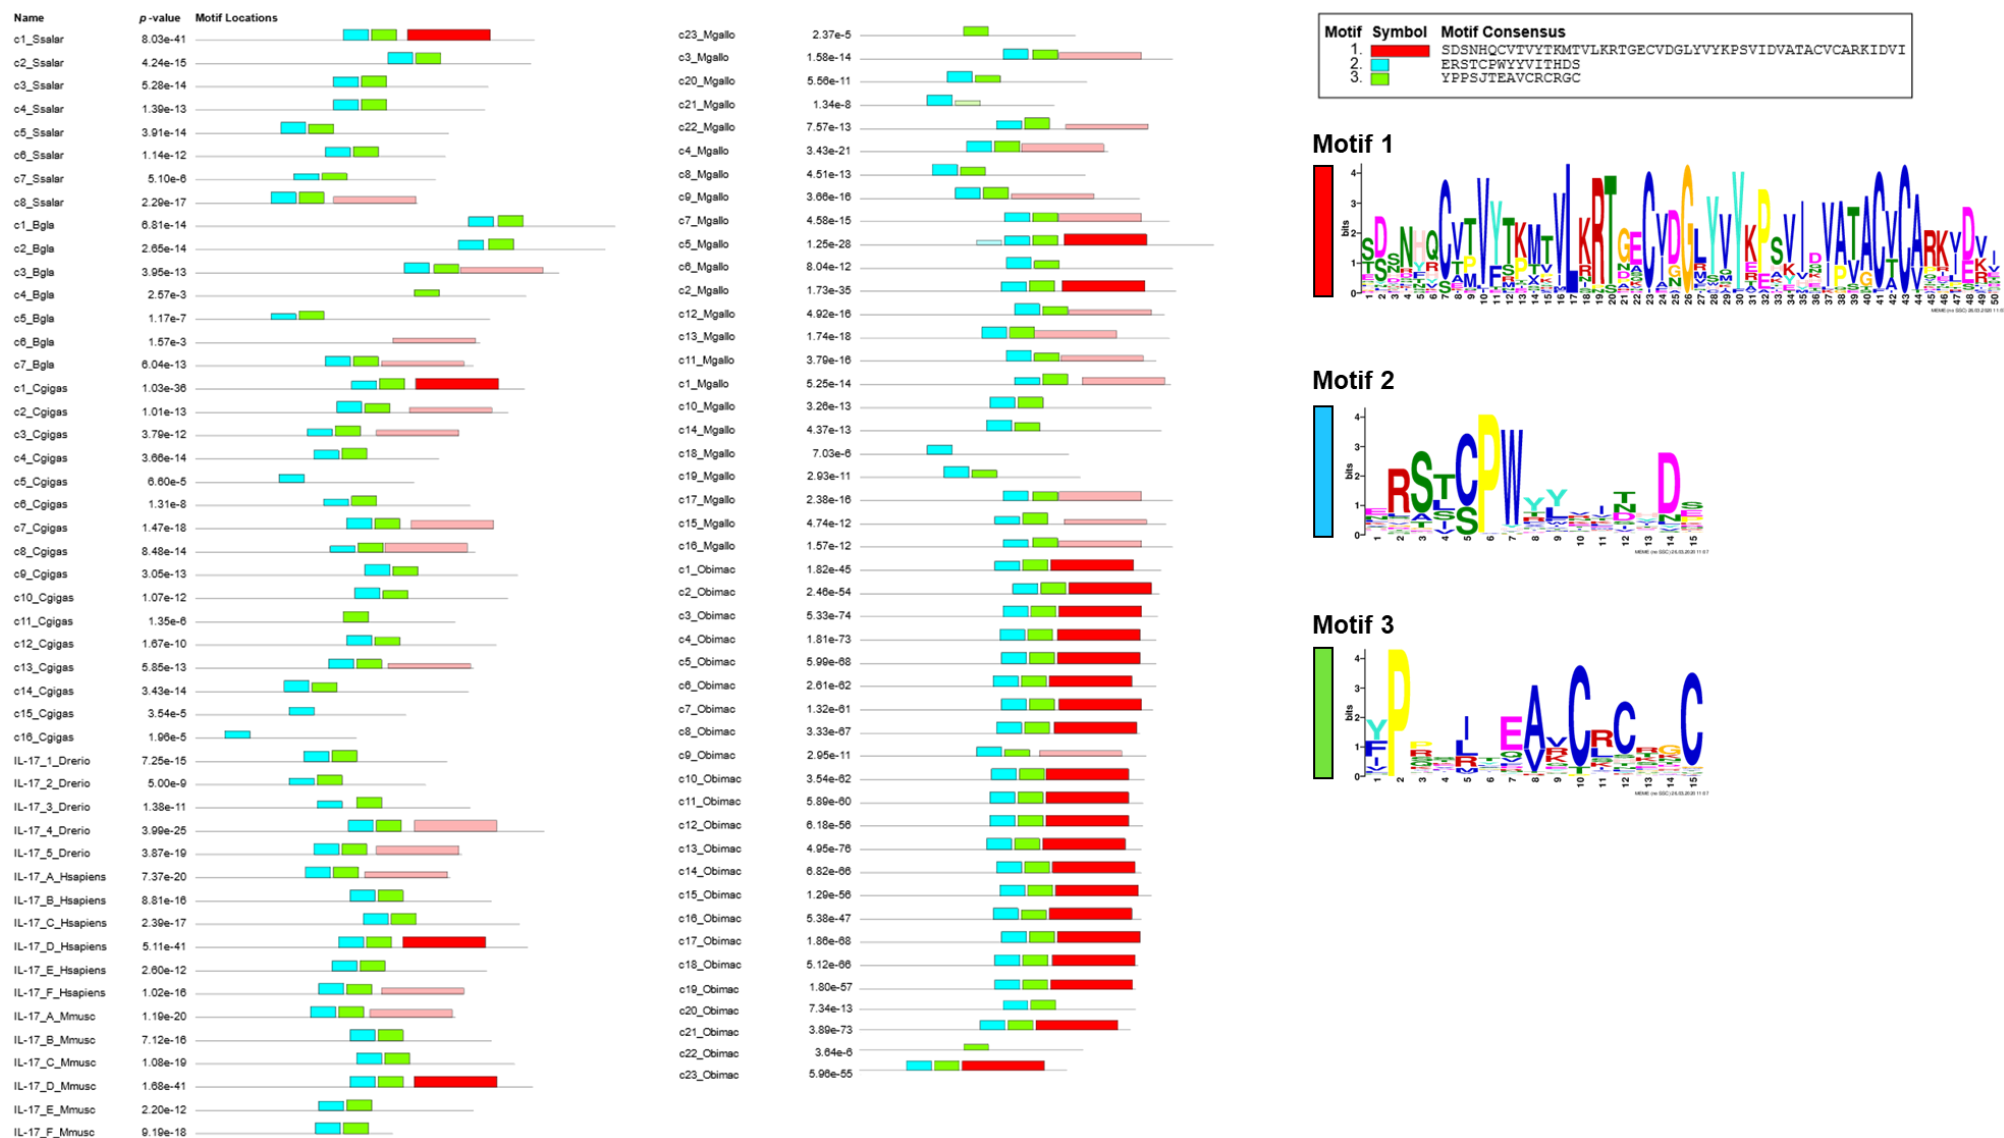

**Supplementary Figure S3. Conserved motif analysis in representative sequences of IL-17 isoforms different selected species.** Although the amino acid identity is low between sequences from different phyla, there is a great conservation at the motif level, relative to the functional IL-17 domain region. Conserved motif logos show the defining cysteine pattern and a conserved motif consisting in CPW in invertebrate sequences and SPW in chordate species.

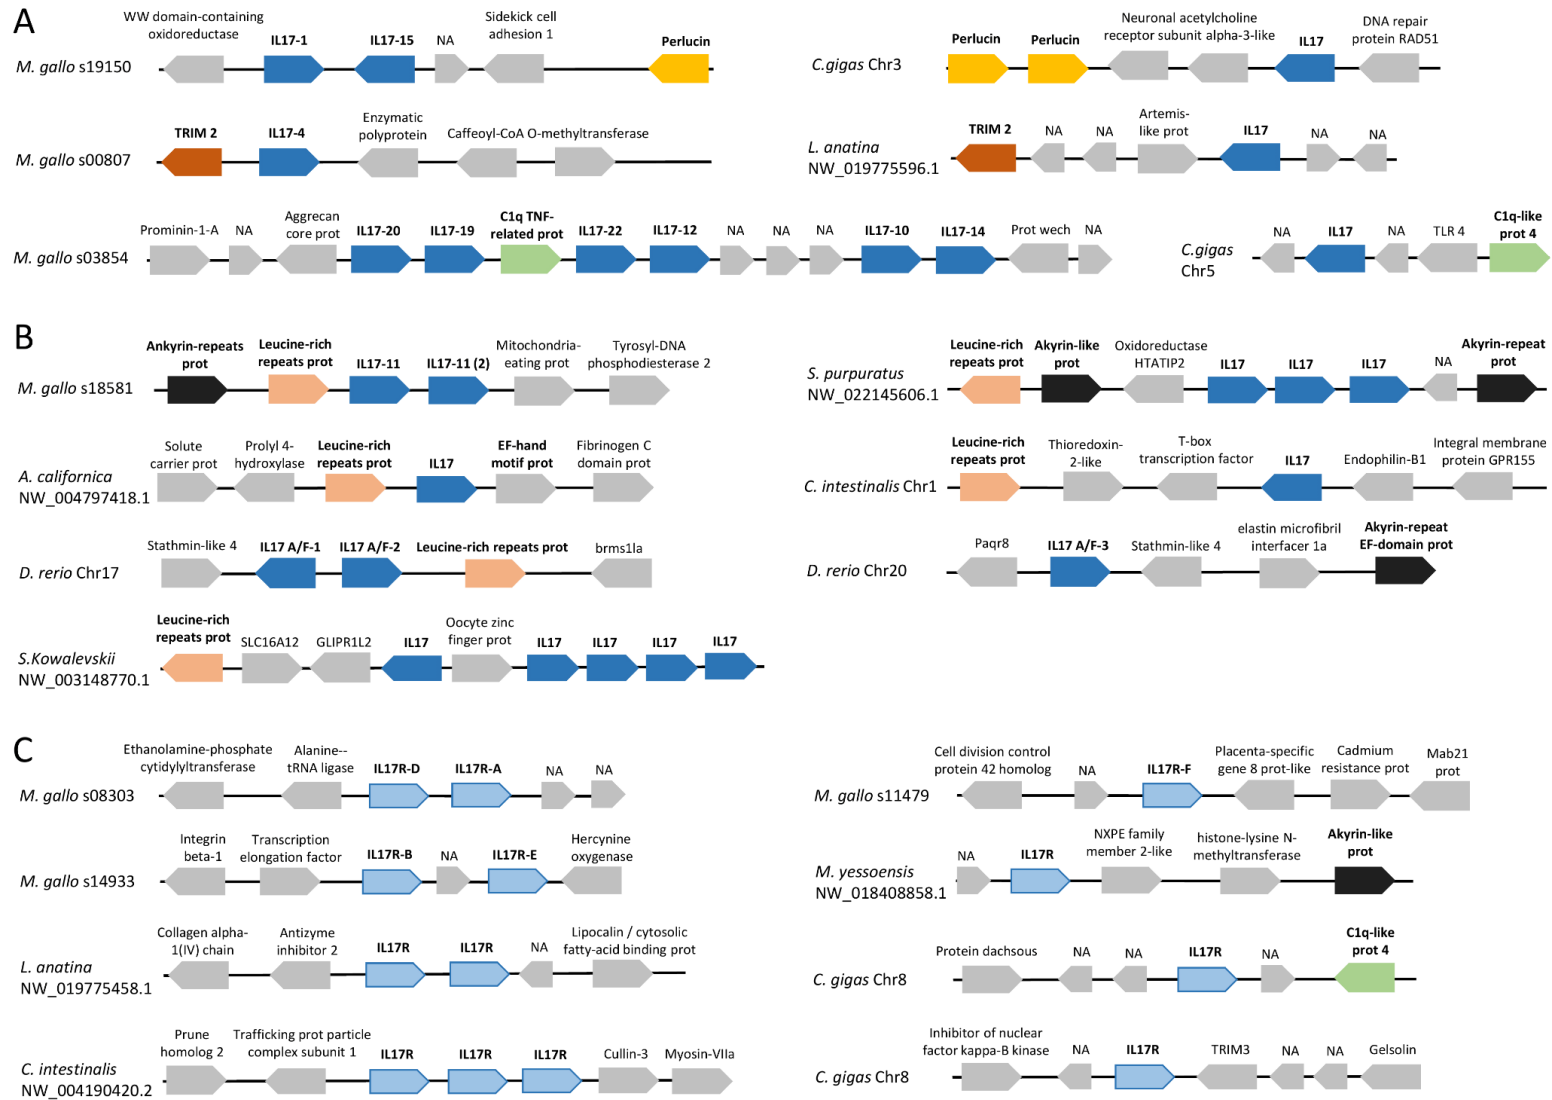

**Supplementary Figure S4. Synteny conservation analyses between IL-17 genes throughout different phyla.** The higher homologies found were presented, which evidences the absence of synteny conservation between the different IL-17 families. Genes were represented with their functional annotation to allow the visualization of putative conservations. Some interesting genes were found repeatedly, as Perlucin, TRIM-2, C1q-related proteins (**A**), or more frequently Leucine-rich proteins and Ankyrin repeats proteins (**B**). IL-17 receptor genes also did not show synteny conservation (**C**).

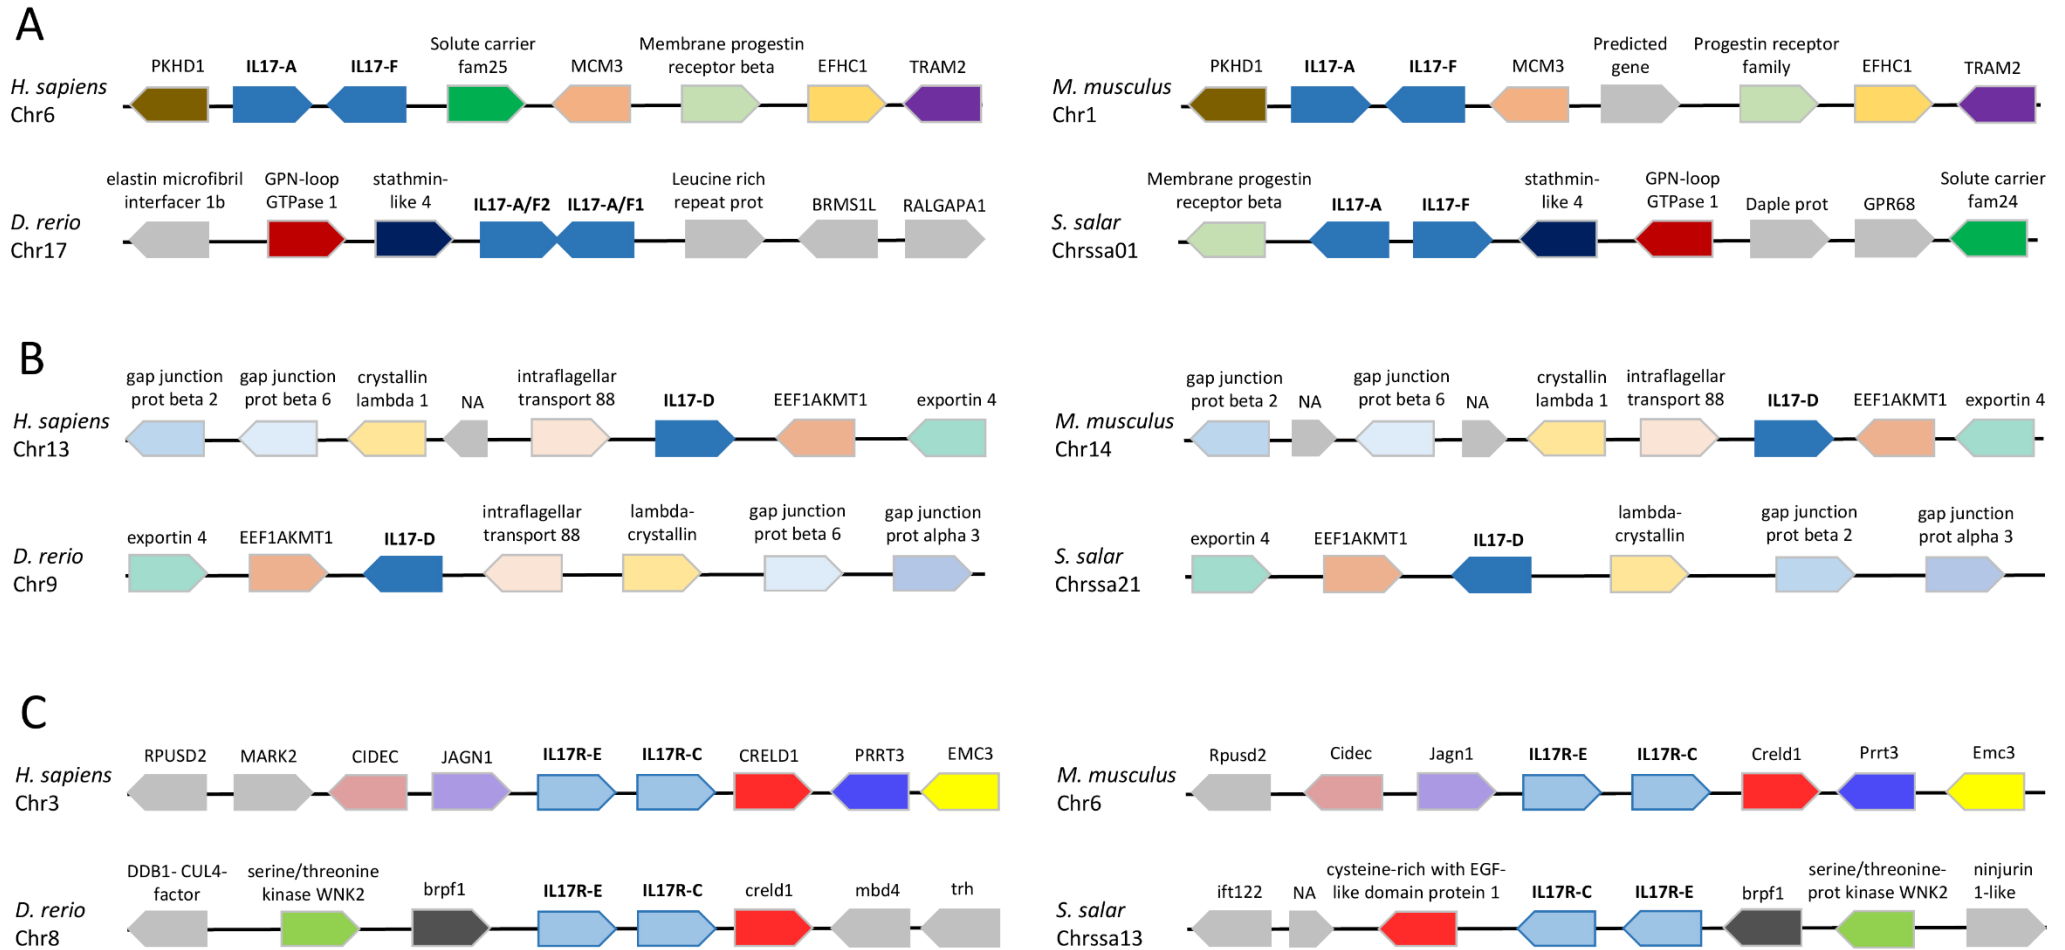

**Supplementary Figure S5. IL-17 homolog genes among the repertoires of chordate vertebrate species did show synteny conservation.** Instead of the absence of it between isoforms from different phyla, vertebrate species maintained synteny conservation as it is represented for IL17-A and IL17-F homologs (A), IL17-D homologs (B) and IL17R-E and IL17R-C homologs (C). Neighbor genes are represented with the official gene symbols in these species. It can be observed as well that in vertebrate species, some IL-17 genes appear together as well, but no tandem repetitions were observed as it happened in the expanded repertoires of marine invertebrates.

Antisense

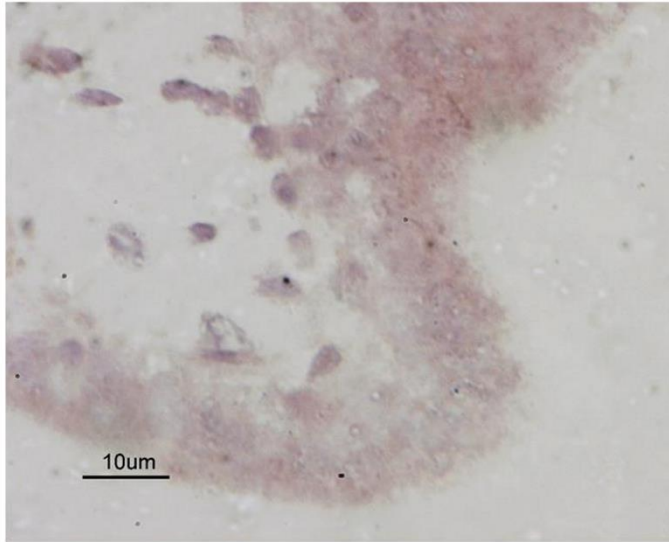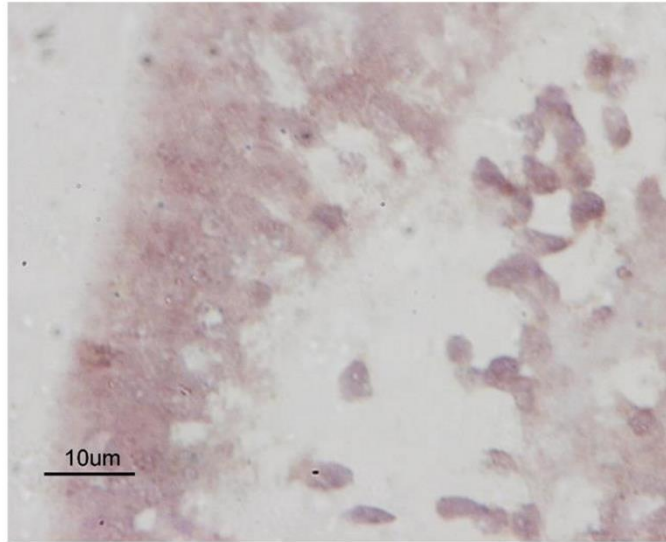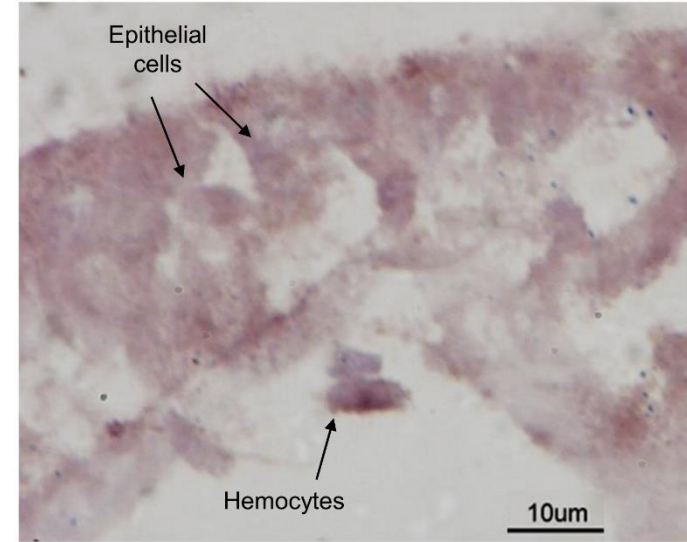

Sense

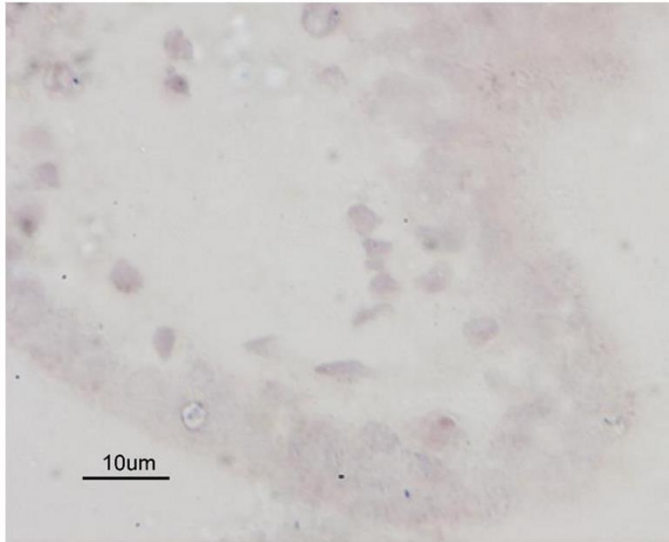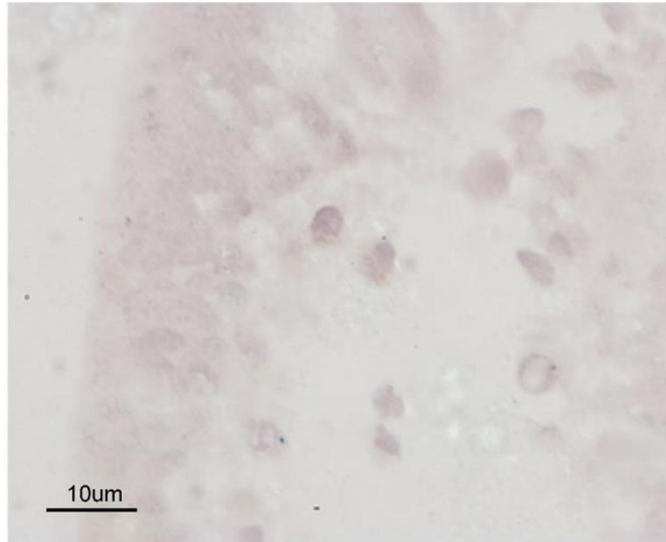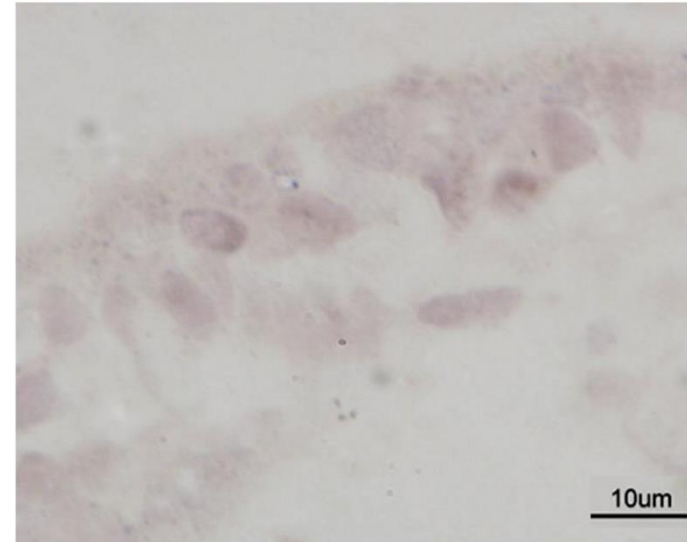

**Supplementary Figure S6. IL17-3 expression at the mRNA level was detected by ISH in histologic preparations of mussel gills using specific antisense RNA probes.** Control samples were hybridized with the sense probes. Replicate sections were used with sense and antisense probes. Alkaline phosphatase detection of hybridized antisense probes in comparison with the absence of colour reaction in the sense probe negative controls reveals expression of IL17-3 mRNA in mussel gills in both epithelial cells and infiltrated hemocytes.

**Supplementary Table ST1. Primers and probes sequences used in the ISH and qPCR analyses.**

| Primers used for obtaining ISH specific RNA probes |                                              |            |
|----------------------------------------------------|----------------------------------------------|------------|
| IL17-3 F Sp6                                       | ACGATTTAGGTGACACTATAGAACGCTGTATGGCGTCTTCTCT  |            |
| IL17-3 R T7                                        | AGTTAATACGACTCACTATAGGGATTTTTCACGGAAGGTTGGAC |            |
| qPCR primers                                       |                                              | Efficiency |
| IL17-1 F                                           | TGGGCATCTTCCTTCTTTTG                         | -2.8438    |
| IL17-1 R                                           | TGAGACGGATACGAGCTGAG                         |            |
| IL17-2 F                                           | TACGCTGTCGTTGTCAAGGT                         | -3.2922    |
| IL17-2 R                                           | ACACCATTTTCGAAACTCC                          |            |
| IL17-3 F                                           | CGCTGTATGGCGTCTTCTCT                         | -3.0403    |
| IL17-3 R                                           | TTTTTCACGGAAGGTTGGAC                         |            |
| IL17-5 F                                           | TTCGAGAAGGTGAATGACCA                         | -3.74      |
| IL17-5 R                                           | GCACATGCCCTATACCATCA                         |            |
| IL17-7 F                                           | CAACAGGGCTGTGAGAGGAT                         | -3.6593    |
| IL17-7 R                                           | ACGGAACATCATCAGAAGG                          |            |
| IL17-8 F                                           | CTTGGACTTTTGTGCGGAAT                         | -3.9911    |
| IL17-8 R                                           | CCTGCCGAAATTGGTTCTAA                         |            |
| IL17-10 F                                          | GCGAGCTGTCTTGGGTCTAC                         | -3.3953    |
| IL17-10 R                                          | GCTTCGGACTGGAGATTGAA                         |            |
| IL17-11 F                                          | CATCCTTCATGGATATGGCA                         | -3.5256    |
| IL17-11 R                                          | TACTACCAACGGAGATCGGC                         |            |
| IL17-14 F                                          | GTA CTGCGTCGTTATTCGGC                        | -2.966     |
| IL17-14 R                                          | ATGGCACATTGAATTACGGC                         |            |
| IL17R-B F                                          | TACCATGTCAATCGGAGCAA                         | -3.77      |
| IL17R-B R                                          | GGTTGTATTGGTTCGAGCGT                         |            |
| IL17R-C F                                          | AATTCCTTGCCCTCCTCACT                         | -3.4259    |
| IL17R-C R                                          | TCTTCGTGTTCTCCAAACC                          |            |
| IL17R-D F                                          | ATGGATCAGCAGACGGTCAT                         | -3.1012    |
| IL17R-D R                                          | GGATCTGAGGGTCTTAGTGCC                        |            |
| IL17R-E F                                          | CAGGTTTCAACGAAGCAACA                         | -3.5102    |
| IL17R-E R                                          | TTTCTTGGTCAATGCTGTCG                         |            |
| IL17R-F F                                          | AACCTGTAGACGATGGCGAC                         | -3.3867    |
| IL17R-F R                                          | GGGAATAGCATCACCAGCAT                         |            |

**Supplementary Table ST2. Genomic information about every IL-17 and IL-17R gene in the mussel reference genome.**

| IL17 Isoform | Scaffold | Strand | Start  | End    | Size  | Exons | Introns | Genes upstream up to 100kb                                                                      | Genes downstream up to 100kb                                                                             |
|--------------|----------|--------|--------|--------|-------|-------|---------|-------------------------------------------------------------------------------------------------|----------------------------------------------------------------------------------------------------------|
| 1            | s19150   | +      | 57693  | 58160  | 468   | 1     | 0       | WW domain-containing oxidoreductase (40kb, -)                                                   | <b>Interleukin 17 isoform IL17-15 (20kb, -)</b>                                                          |
| 15           | s19150   | -      | 77315  | 78739  | 1425  | 2     | 1       | <b>Interleukin 17 isoform IL17-1 (20kb, +)</b>                                                  | NA (10kb, +), Sidekick cell adhesion molecule 1(20kb, -), Perlucin (70kb, -)                             |
| 2            | s08503   | +      | 74410  | 76136  | 1727  | 2     | 1       | N-methyl-L-tryptophan oxidase (20kb, +)                                                         | Vacuolar protein sorting-associated prot 72 (10kb, -)                                                    |
| 2.2          | s18819   | +      | 97545  | 110094 | 12549 | 5     | 4       | E3 ubiquitin-protein ligase rnf213-alpha (10kb, -), NA (10kb, +)                                | Vacuolar protein sorting-associated protein 72 homolog (10kb, -)                                         |
| 7            | s00912   | -      | 54015  | 57627  | 3613  | 2     | 1       | Transposable element Tcb1 transposase (50kb, -), NA (20kb)                                      | <b>Interleukin 17 isoform IL17-6 (10kb, +)</b>                                                           |
| 6            | s00912   | +      | 61736  | 65453  | 3717  | 2     | 1       | <b>Interleukin 17 isoform IL17-7 (10kb, -)</b>                                                  | <b>Interleukin 17 isoform IL17-3 (15kb, -)</b>                                                           |
| 3            | s00912   | -      | 81336  | 82487  | 1151  | 2     | 1       | <b>Interleukin 17 isoform IL17-6 (15kb, +)</b>                                                  | NA (10kb, +)                                                                                             |
| 7.2          | s19460   | -      | 38559  | 41720  | 3162  | 2     | 1       | NA (30kb, -), NA (20kb, +), NA (20kb, -)                                                        | <b>Interleukin 17 isoform 17-6 (6.2) (10kb, +)</b>                                                       |
| 6.2          | s19460   | +      | 45809  | 47832  | 2024  | 2     | 1       | <b>Interleukin 17 isoform IL17-7 (7.2) (10kb, -)</b>                                            | <b>Interleukin 17 isoform IL17-3 (3.2) (20kb, -)</b>                                                     |
| 3.2          | s19460   | -      | 65782  | 67169  | 1388  | 2     | 1       | <b>Interleukin 17 isoform 17-6 (6.2) (20kb, +)</b>                                              | NA (20kb, -)                                                                                             |
| 4            | s00807   | +      | 37179  | 37631  | 453   | 1     | 0       | Tripartite motif-containing protein TRIM 2 (30kb, -)                                            | Enzymatic polypeptide (20kb, -), Caffeoyl-CoA O-methyltransferase (30kb, -) (60kb, +)                    |
| 4.2          | s11726   | +      | 55664  | 56115  | 451   |       |         | Retrovirus-related Pol polyprotein from transposon 412 (10kb, -)                                | Neurogenic locus notch homolog protein 1 (50kb, +)                                                       |
| 5            | s11170   | +      | 627169 | 629544 | 2376  | 2     | 1       | NA (90kb, -), C-type lectin domain family 7 member A (10kb, +)                                  |                                                                                                          |
| 8            | s04570   | +      | 71540  | 84211  | 12672 | 7     | 6       | NA (40kb, -), 2'-5'-oligoadenylate synthase 3 (30kb, +) (10kb, +)                               | Zinc metalloproteinase nas-36 (20kb, -)                                                                  |
| 13           | s00443   | -      | 185155 | 185718 | 564   | 1     | 0       | NA (20kb, -), Small proline-rich protein 3 (15kb, -), NA (10kb, -)                              | <b>Interleukin 17 isoform IL17-9 (10kb, -)</b>                                                           |
| 9            | s00443   | -      | 191805 | 192224 | 420   | 1     | 0       | <b>Interleukin 17 isoform IL17-13 (10kb, -)</b>                                                 |                                                                                                          |
| 20           | s03854   | +      | 229973 | 230386 | 414   | 1     | 0       | Prominin-1-A (60kb, +), NA (40kb, +), Aggrecan core protein (10kb, -)                           | <b>Interleukin 17 isoform IL17-19 (10kb, +)</b>                                                          |
| 19           | s03854   | +      | 241593 | 241994 | 401   | 1     | 0       | <b>Interleukin 17 isoform IL17-20 (10kb, +)</b>                                                 | Complement C1q TNF-related prot (5kb, +), <b>Interleukin 17 isoform IL17-22 (25kb, +)</b>                |
| 22           | s03854   | +      | 265989 | 266393 | 405   |       |         | <b>Interleukin 17 isoform IL17-19 (25kb, +), Complement C1q TNF-related prot (5kb, +)</b>       | <b>Interleukin 17 isoform IL17-12 (10kb, +)</b>                                                          |
| 12           | s03854   | +      | 276125 | 277549 | 1425  | 2     | 1       | <b>Interleukin 17 isoform IL17-22 (10kb, +)</b>                                                 | NA (5kb, +) (15kb, +) (20kb, +), <b>Interleukin 17 isoform IL17-10 (50kb, +)</b>                         |
| 10           | s03854   | +      | 323680 | 324210 | 540   |       |         | <b>Interleukin 17 isoform IL17-12 (50kb, +)</b>                                                 | <b>Interleukin 17 isoform IL17-14 (25kb, +)</b>                                                          |
| 14           | s03854   | +      | 350092 | 352774 | 2683  | 2     | 1       | <b>Interleukin 17 isoform IL17-10 (25kb, +)</b>                                                 | Protein wech (5kb, -), NA (30kb, +)                                                                      |
| 11           | s18581   | +      | 178618 | 179154 | 536   |       |         | Ankyrin-repeats 3 prot (100kb, +), Leucine-rich repeat kinase 2 (15kb, +)                       | <b>Interleukin 17 isoform 17-11 (11.2) (10kb)</b>                                                        |
| 11.2         | s18581   | +      | 187960 | 188499 | 450   |       |         | <b>Interleukin 17 isoform 17-11 (11.1) (10kb)</b>                                               | Mitochondria-eating prot (20kb, +), Tyrosyl-DNA phosphodiesterase 2 (70kb, -), Tyr-prot kinase (90kb, +) |
| 16           | s15501   | -      | 140923 | 142624 | 1701  | 2     | 1       | E3 ubiquitin-protein ligase HACE1 (70kb, +), NA (60kb, +), NA (40kb, +)                         |                                                                                                          |
| 17           | s03945   | +      | 12022  | 17664  | 5643  | 2     | 1       |                                                                                                 | Myb/SANT-DNA-binding prot (30kb, -), fucosyltransferase (40kb, +), xylosyl-glucuronyltransf. (60kb, +)   |
| 18           | s11501   | +      | 197164 | 198319 | 1156  | 2     | 1       | Baculoviral IAP repeat-containing protein 2 (90kb, -), Plexin-A4 (30kb, -), NA (20kb, -)        | Chymotrypsin-like serine proteinase (40kb, -), Chymotrypsinogen B (50kb, -)                              |
| 18.2         | s18725   | -      | 3489   | 3869   | 380   | 1     | 0       |                                                                                                 | NA (5k, +), NA (8kb, -), <b>Interleukin 17 isoform IL17-18 (18.3) (10kb)</b>                             |
| 18.3         | s18725   | -      | 13743  | 14123  | 380   |       |         | <b>Interleukin 17 isoform IL17-18 (18.2) (10kb, -)</b>                                          | NA (30kb, +) (35kb, +) (50kb, +)                                                                         |
| 21           | s08023   | -      | 12972  | 13323  | 351   |       |         | NA (10kb, -)                                                                                    | <b>Interleukin 17 isoform IL17-21 (21.2) (8kb, -)</b>                                                    |
| 21.2         | s08023   | -      | 20930  | 21280  | 351   |       |         | <b>Interleukin 17 isoform IL17-21 (21) (8kb, -)</b>                                             | <b>Interleukin 17 isoform IL17-21 (21.3) (6kb, -)</b>                                                    |
| 21.3         | s08023   | -      | 27507  | 27860  | 354   |       |         | <b>Interleukin 17 isoform IL17-21 (21.2) (6kb, -)</b>                                           | Fatty acid-binding protein, heart (15kb, -), NA (50kb, -)                                                |
| 23           | s11648   | +      | 25242  | 25636  | 395   |       |         | NA (20kb, +), NA (15kb, -)                                                                      | NA (40kb, +), NA (50kb, -)                                                                               |
| Receptors    | Scaffold | Strand | Start  | End    | Size  | Exons | Introns | Genes upstream (10.000 pb)                                                                      | Genes downstream (10.000 pb)                                                                             |
| A            | s03747   | -      | 334875 | 335949 | 9118  | 3     | 2       | UPF0577 prot KIAA1324-like homolog (80kb, -), M-phase inducer phosphatase 3 (10kb, -)           | <b>Interleukin 17 Receptor isoform IL17R-D (30kb, -)</b>                                                 |
| D            | s03747   | -      | 365629 | 403291 | 38096 | 11    | 10      | <b>Interleukin 17 Receptor isoform IL17R-A (30kb, -)</b>                                        | M-phase inducer phosphatase 3 (10kb, +), Pre-mRNA-splicing factor spp2 (40kb, +), NA (50kb, -)           |
| D.2          | s08303   | +      | 46221  | 47398  | 1178  | 1     | 0       | Ethanolamine-phosphate cytidyltransferase (30kb, -), Alanine--tRNA ligase (5kb, -)              | <b>Interleukin 17 Receptor isoform IL17R-A (A.2) (20kb, +)</b>                                           |
| A.2          | s08303   | +      | 68708  | 79676  | 10968 | 6     | 5       | <b>Interleukin 17 Receptor isoform IL17R-D (D.2) (20kb, +)</b>                                  | NA (30kb, +), NA (40kb, +)                                                                               |
| B            | s14933   | +      | 333175 | 352583 | 19409 | 11    | 10      | Integrin beta-1-binding prot (40kb, -), Transcription elongation factor (15kb, +), NA (10kb, +) | NA (10kb, +), <b>Interleukin 17 Receptor isoform IL17R-E (30kb, +)</b>                                   |
| E            | s14933   | +      | 379997 | 391333 | 11337 | 11    | 10      | <b>Interleukin 17 Receptor isoform IL17R-B (30kb, +)</b>                                        | Hercynine oxygenase (5kb, -), NA (30kb, -), NA (40kb, -)                                                 |
| C            | s16435   | +      | 38823  | 43348  | 4526  | 3     | 2       | NA(50kb, -), NA (40kb, -)                                                                       | -                                                                                                        |
| F            | s11479   | +      | 55154  | 73446  | 18292 | 11    | 10      | Cell division control protein 42 homolog (50kb, -), NA (10kb, +)                                | Placenta-specific prot (5kb, -), cadmium resistance prot (30kb, +), mab21 protein(60kb, -)               |
